# Supplementary material for: Rapid birth-and-death evolution of the xenobiotic metabolizing NAT gene family in vertebrates with evidence of adaptive selection
Source: PubMed Central journal article supplement (PMC3601968; doi:10.1186/1471-2148-13-62), 2013-03-07
Supplement: 1471-2148-13-62-S2.pdf [file 1471-2148-13-62-S2.pdf]

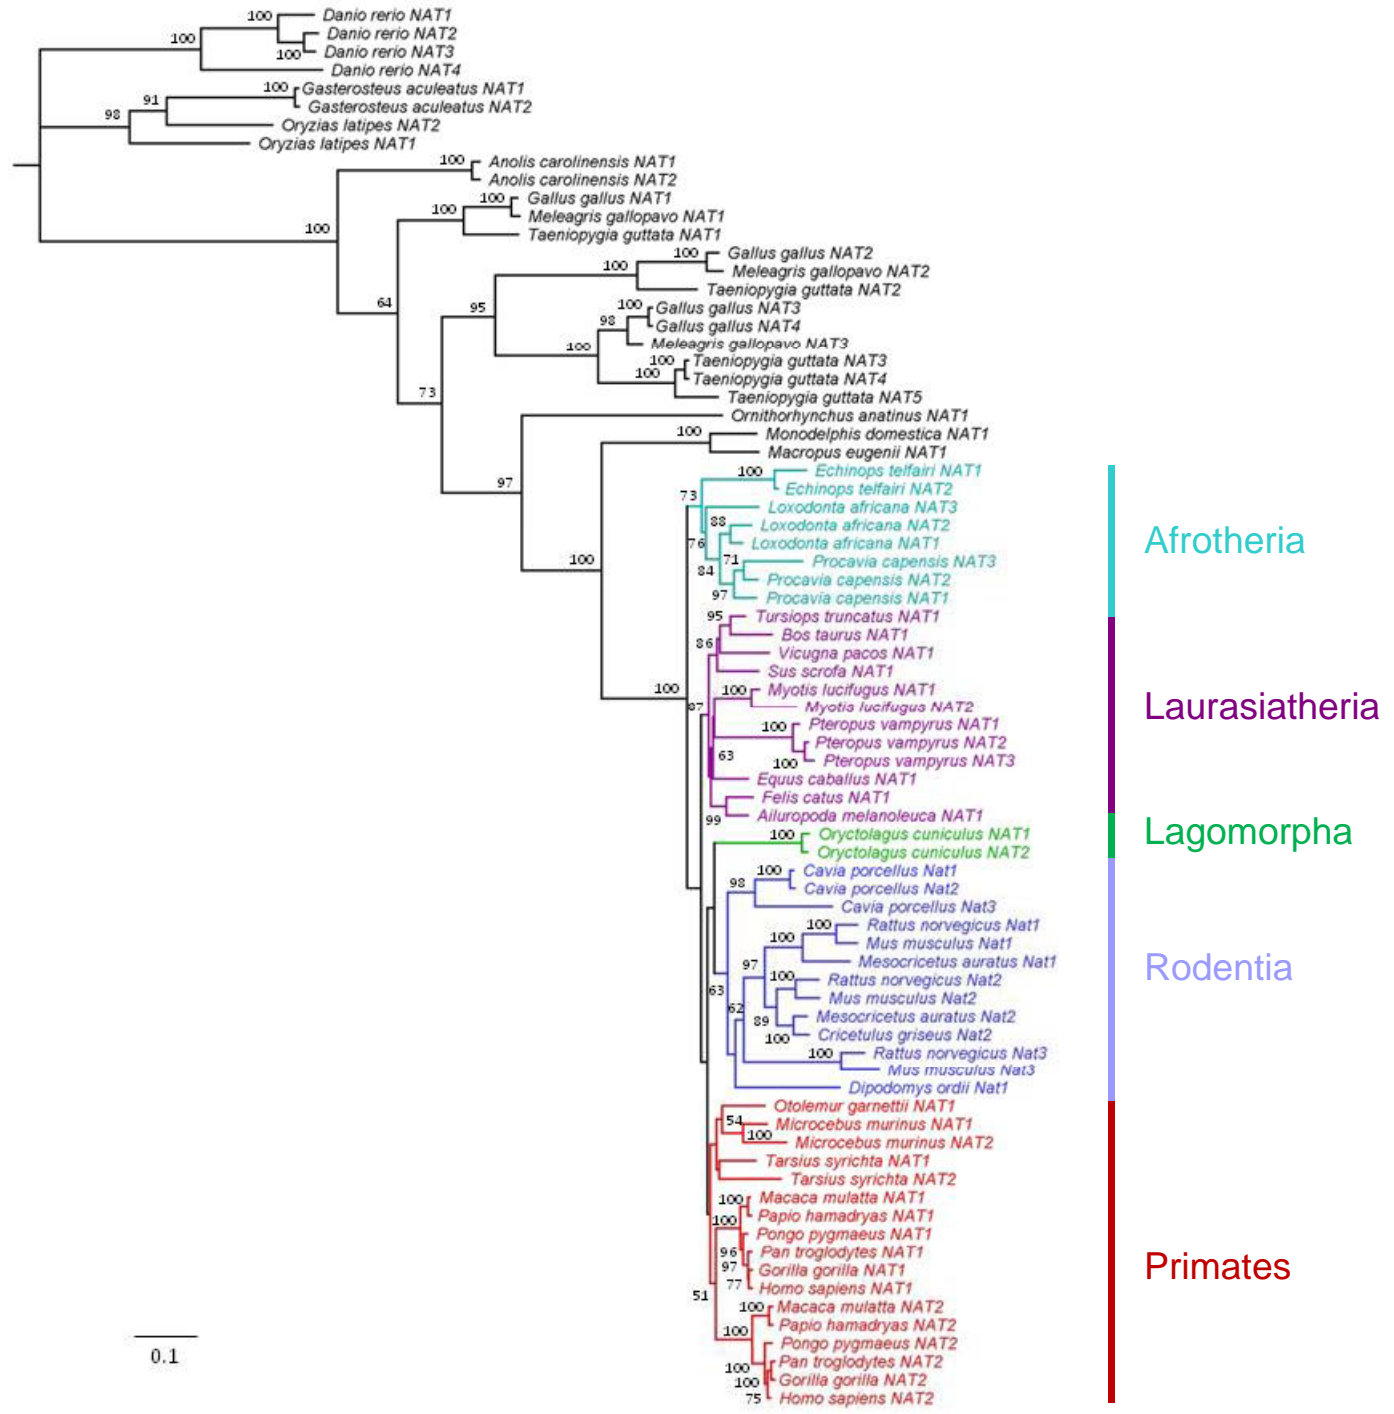

Figure S1

0.1
