# Supplementary material for: Rapid birth-and-death evolution of the xenobiotic metabolizing NAT gene family in vertebrates with evidence of adaptive selection
Source: PubMed Central journal article supplement (PMC3601968; doi:10.1186/1471-2148-13-62), 2013-03-07
Supplement: 1471-2148-13-62-S3.pdf [file 1471-2148-13-62-S3.pdf]

*H. sapiens*  
Chr 8

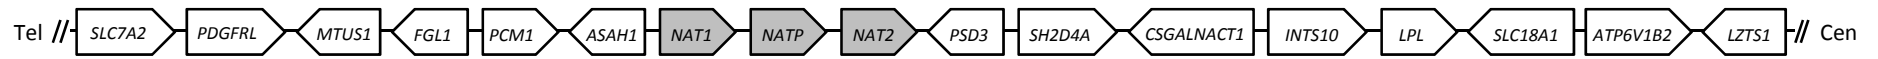

*M. musculus*  
Chr 8

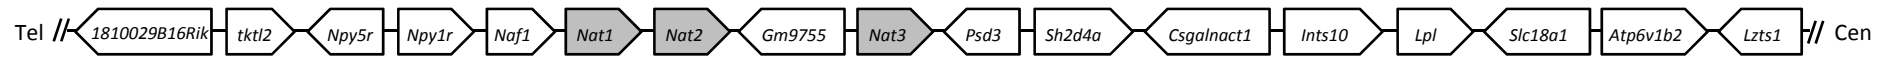

Figure S2
